# Supplementary material for: Chrysoeriol Improves the Early Development Potential of Porcine Oocytes by Maintaining Lipid Homeostasis and Improving Mitochondrial Function
Source: MDPI journal article supplement (doi:10.3390/antiox13010122), 2024-01-19
Supplement: s1 [file s1]

**TableS1:Primer sequences used for real-time PCR**

| <b>Genes</b>                  | <b>Primer sequences (5'-3')</b> | <b>Base</b> |
|-------------------------------|---------------------------------|-------------|
| <i>GAPDH</i>                  | F:GTCGGTTGTGGATCTGACCT          | 20          |
|                               | R:TTGACGAAGTGGTCGTTGAG          | 20          |
| <i>RN18s</i>                  | F:TCCAATGGATCCTCGCGGAA          | 20          |
|                               | R:GGCTACCACATCCAAGGAAG          | 20          |
| <i>PTX3</i>                   | F:GGCCAGGGATGAATTTTAC           | 19          |
|                               | R:GCTATCCTCTCCAACAAGTGA         | 21          |
| <i>PTGS1</i>                  | F:CAACACGGCACACGACTACA          | 20          |
|                               | R:CTGCTTCTTCCCTTTGGTCC          | 20          |
| <i>PTGS2</i>                  | F:ACAGGGCCATGGGGTGGACT          | 20          |
|                               | R:CCACGGCAAAGCGGAGGTGT          | 20          |
| <i>HAS2</i>                   | F:AGTTTATGGGCAGCCAATGTAGTT      | 24          |
|                               | R:GCACTTGGACCGAGCTGTGT          | 20          |
| <i>GLI1</i>                   | F:AGAGGGACAGCTCTGAACAC          | 20          |
|                               | R:GCTACGTCTCTTCCTCCTGA          | 20          |
| <i>GDF9</i>                   | F:CAGTCAGCTGAAGTGGGACA          | 20          |
|                               | R:TGGATGATGTTCTGCACCAT          | 20          |
| <i>BMP15</i>                  | F:CCTCCATCCTTTCCAAGTCA          | 20          |
|                               | R:GTGTAGTACCCGAGGGCAGA          | 20          |
| <i>CYCLIN B1</i>              | F:CAACTGGTTGGTGTCACTGC          | 20          |
|                               | R:TTCCATCTGCCTGATTTGGT          | 20          |
| <i>CDK1</i>                   | F:GGGCACTCCCAATAATGAAGT         | 21          |
|                               | R:GTTCTTGATAACAACGTGTGGGAA      | 23          |
| <i>POU5F1</i>                 | F:TTTGGGAAGGTGTTCAGCCAAACG      | 24          |
|                               | R:TCGGTTCTCGATACTTGTCCGCTT      | 24          |
| <i>NANOG</i>                  | F:GGTTTATGGGCCTGAAGAAA          | 20          |
|                               | R:GATCCATGGAGGAAGGAAGA          | 20          |
| <i>SOX2</i>                   | F:ATGCACAACCTCGGAGATCAG         | 20          |
|                               | R:TATAATCCGGGTGCTCCTTC          | 20          |
| <i>CDK2</i>                   | F:TGTGCGAGTGGATGCGGAAG          | 20          |
|                               | R:CCGAATGGTGATGTAGCGAC          | 20          |
| <i>PCNA</i>                   | F:CCTGTGCAAAAGATGGAGTG          | 20          |
|                               | R:GGAGAGAGTGGAGTGGCTTTT         | 21          |
| <i>DNMT1</i>                  | F:TCGAACCAAAACGGCAGTAC          | 20          |
|                               | R:CGGTCAGTTTGTGTTGGACA          | 20          |
| <i>GLUT1</i>                  | F:GCTTCCAGTATGTGGAGCAA          | 20          |
|                               | R:AAGCAATCTCATCGAAGGTC          | 20          |
| <i>1L-1<math>\beta</math></i> | F:GCCAATGGTTTTCTCTGTGATGCC      | 24          |
|                               | R:CTCATGCAGAACACCACTTCTCTC      | 24          |
| <i>DNMT3B</i>                 | F:AGTGTGTGAGGAGTCCATTG          | 20          |
|                               | R:GCTTCCGCCAATCACCAGT           | 19          |

|                                |                             |    |
|--------------------------------|-----------------------------|----|
| <i>BAX</i>                     | F:TGCCTCAGGATGCATCTACC      | 20 |
|                                | R:AAGTAGAAAAGCGCGACCAC      | 20 |
| <i>BCL2</i>                    | F:AGGGCATTTCAGTGACCTGAC     | 20 |
|                                | R:CGATCCGACTCACCAATACC      | 20 |
| <i>PPAR<math>\gamma</math></i> | F:AGAGCTGATCCAATGGTTGC      | 20 |
|                                | R:GAGTTGGAAGGCTCTTCGTG      | 20 |
| <i>ACACA</i>                   | F:AACAAGGACCTGGTGGAGTG      | 20 |
|                                | R:GTCATGTGCACGATGGAATC      | 20 |
| <i>FASN</i>                    | F:AACTTCCGAGACGTCATGCT      | 20 |
|                                | R:GTGCTGAAGCAGCAGAACAG      | 20 |
| <i>SREBP1</i>                  | F:ACCCGCTTCTTCCTGAGTA       | 19 |
|                                | R:ACGGAACAACCTGAGTCACCT     | 20 |
| <i>ATGL</i>                    | F:CGAACTCAAGAGCACCATCA      | 20 |
|                                | R:TTGCACATCTCTCGAAGCAC      | 20 |
| <i>HSL</i>                     | F:TGTCTTTGCGGGTATTCG        | 18 |
|                                | R:TTGTGCGGAAGAAGATGC        | 18 |
| <i>CPT1B</i>                   | F:ATCAAGCCTGTGATGGCTCT      | 20 |
|                                | R:GAGCCACACCTTGAAGAAGC      | 20 |
| <i>CPT2</i>                    | F:AGTTCCAGAGAGGAGGCAAAG     | 21 |
|                                | R:GAGCATCTCTTGGTGAAGACG     | 21 |
| <i>TFAM</i>                    | F:TCCGTTTCAGTTTTGCGTATG     | 20 |
|                                | R:TTGTACACCTGCCAGTCTGC      | 20 |
| <i>ND1</i>                     | F:TCCTACTGGCCGTAGCATTCCT    | 22 |
|                                | R:TTGAGGATGTGGCTGGTCGTAG    | 22 |
| <i>NRF1</i>                    | F:ACCATCCAGACAACGCAA        | 18 |
|                                | R:ACTCCAGTAAGTGCTCCGAC      | 20 |
| <i>NRF2</i>                    | F:GCCCAGTCTTCATTGCTCCT      | 20 |
|                                | R:AGCTCCTCCCAAACCTTGCTC     | 20 |
| <i>TFB1M</i>                   | F:CGAGGGCTTGGAATGTTA        | 18 |
|                                | R:CGTGTGCCTGAGTTCTTCT       | 19 |
| <i>TFB2M</i>                   | F:GCAAGGAGGAAGGATGTT        | 18 |
|                                | R:CAAGTAATGCTCGTGTGTCAGG    | 20 |
| <i>PGC1<math>\alpha</math></i> | F:TTCCGTATCACCACCCAAAT      | 20 |
|                                | R:ATCTACTGCCTGGGGACCTT      | 20 |
| <i>PRDX2</i>                   | F:ATGGTGTGCTGAAGGAAGATGAAGG | 25 |
|                                | R:CATGCTCGTCTGTGTACTGGAAGG  | 24 |

---

**F:Forward primer; R:Reverse primer**
